# Supplementary material
Source: PubMed Central journal article supplement (PMC3038716)

**Figure S1.** Hypoxia-selected regions in H1 (Red line) and H2 (Green line)

1) Region 1 and 2 on X-chromosome:

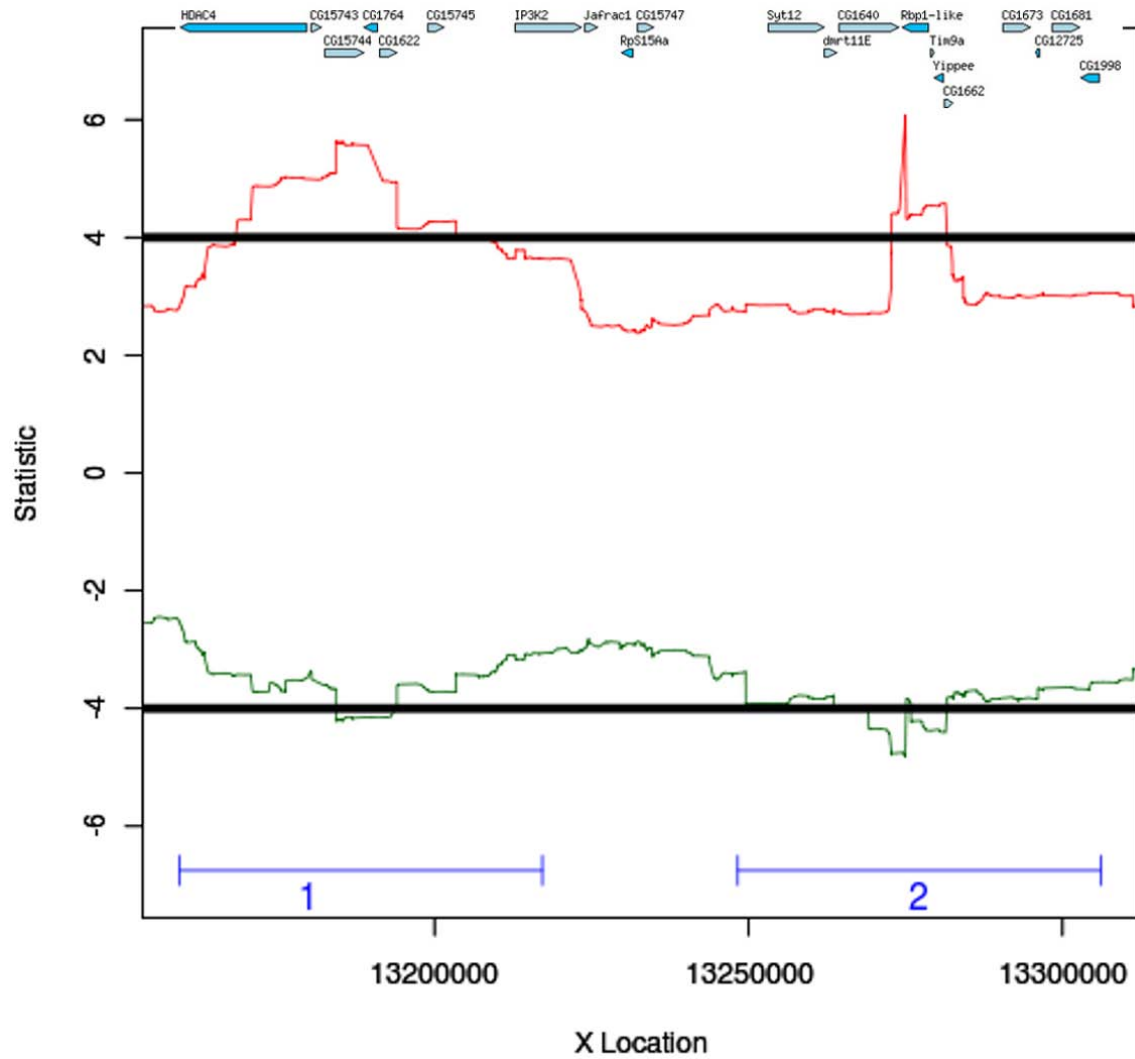

2) Region 3, 4 and 5 on X-chromosome:

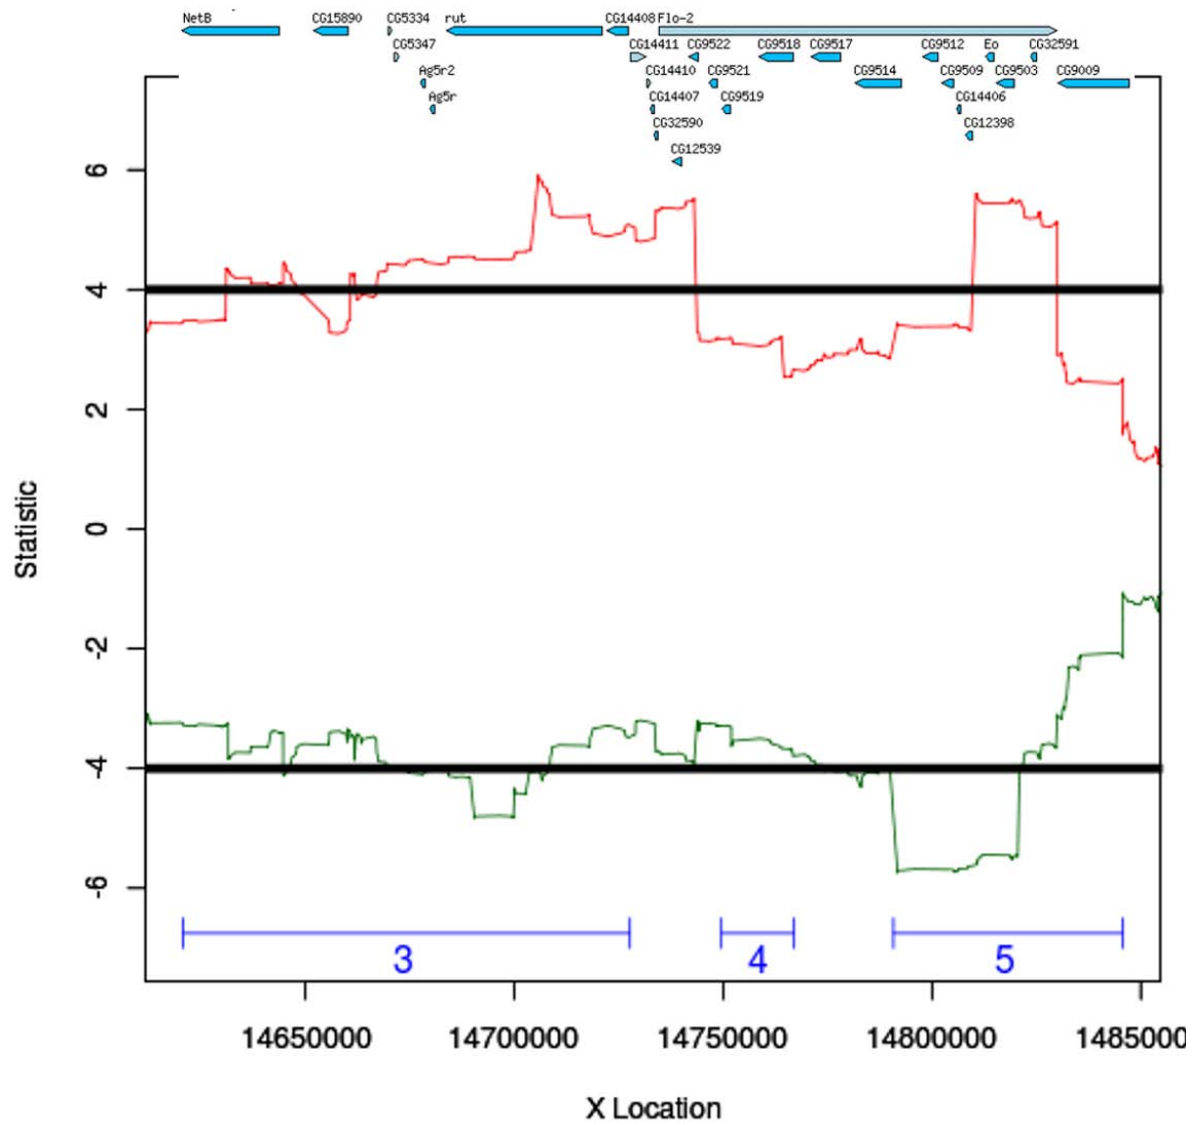

3) Region 6 and 7 on X-chromosome:

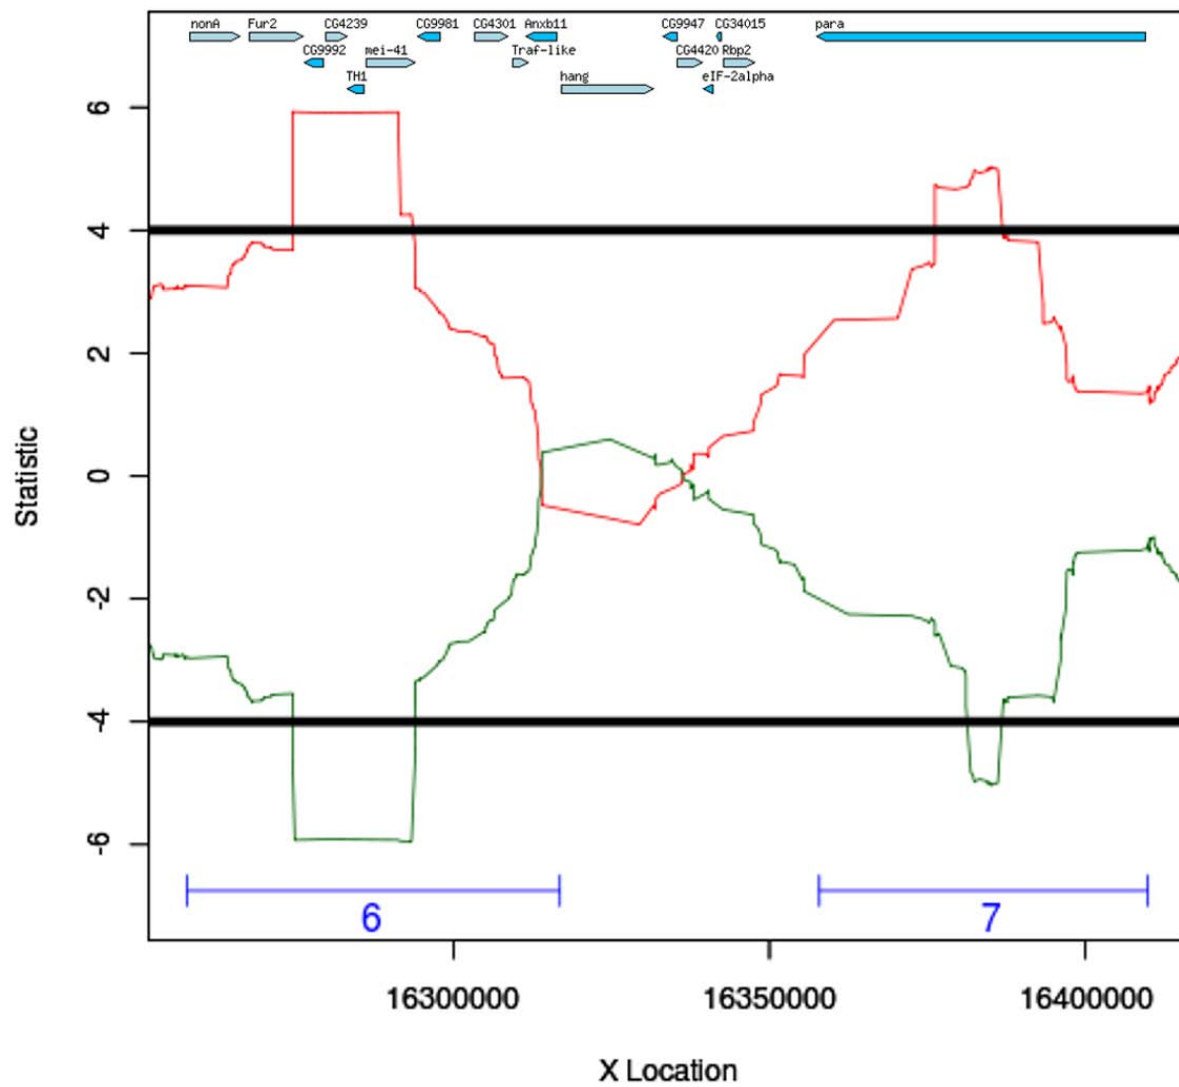

4) Region 8 on X-chromosome:

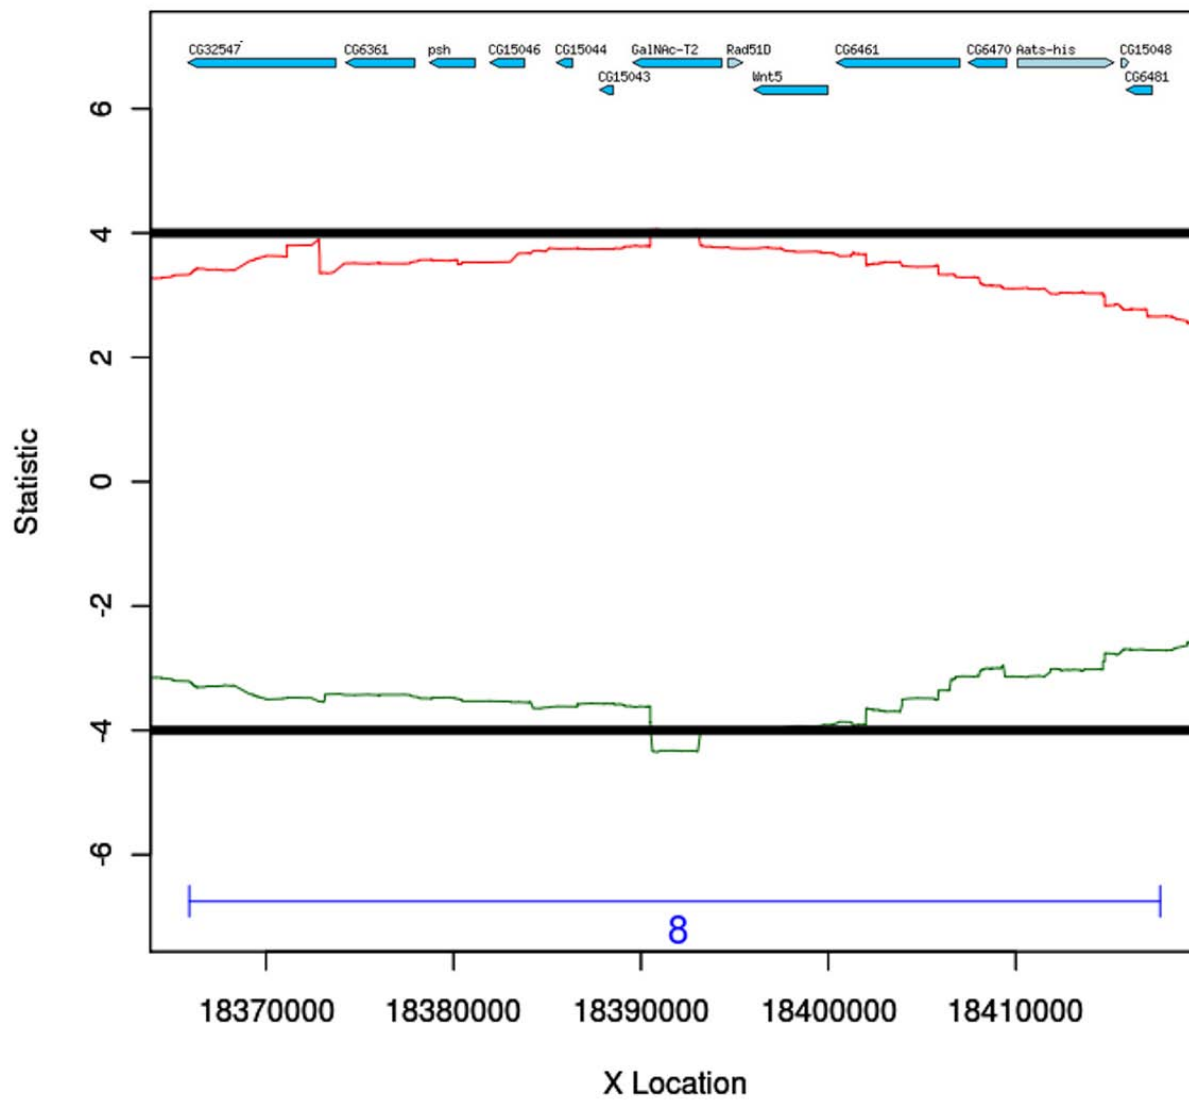

5) Region 9 on X-chromosome:

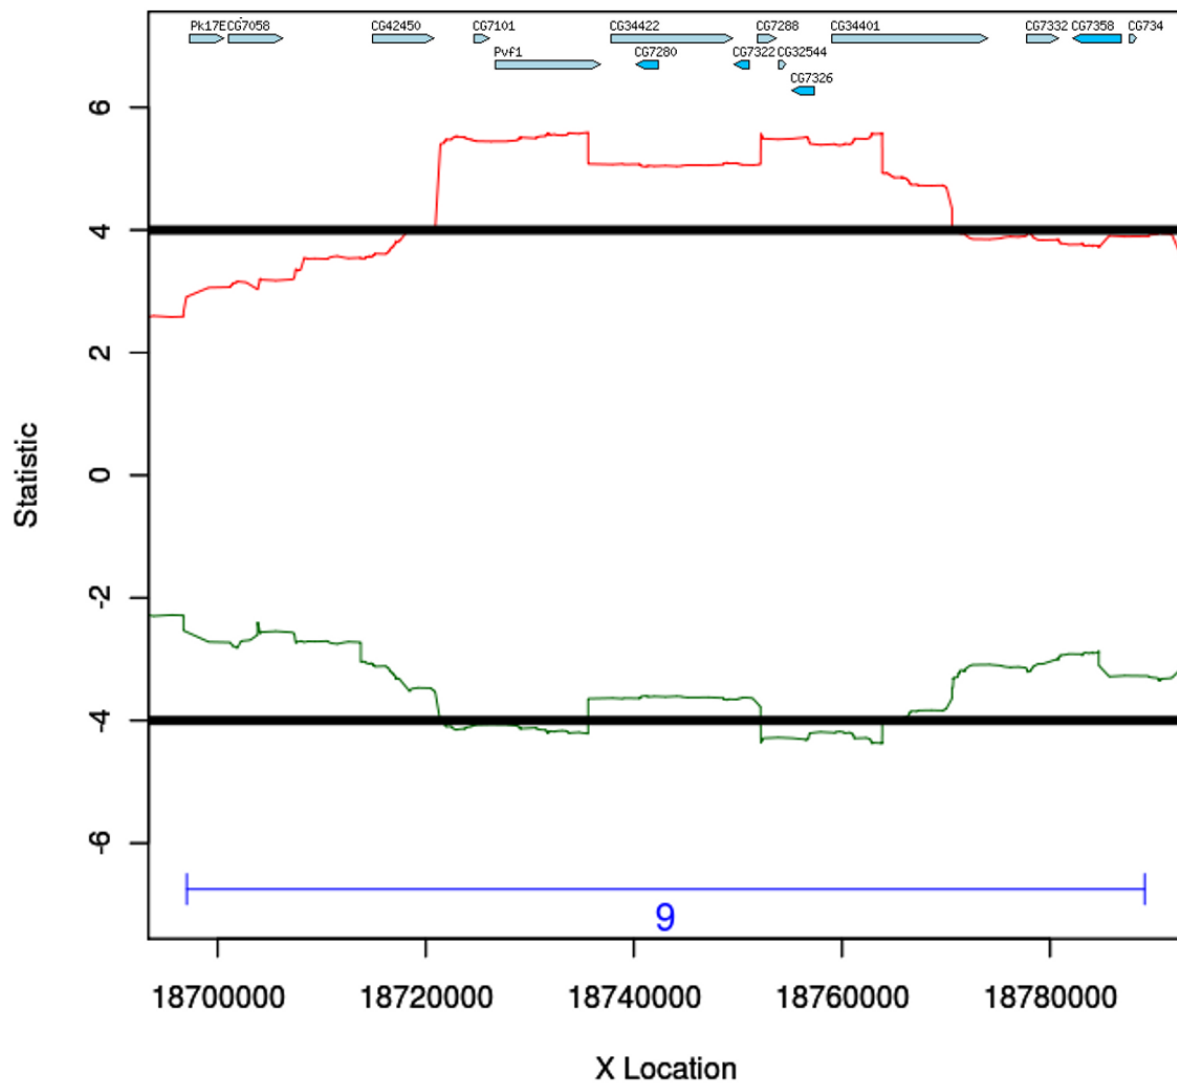

6) Region 10 on X-chromosome:

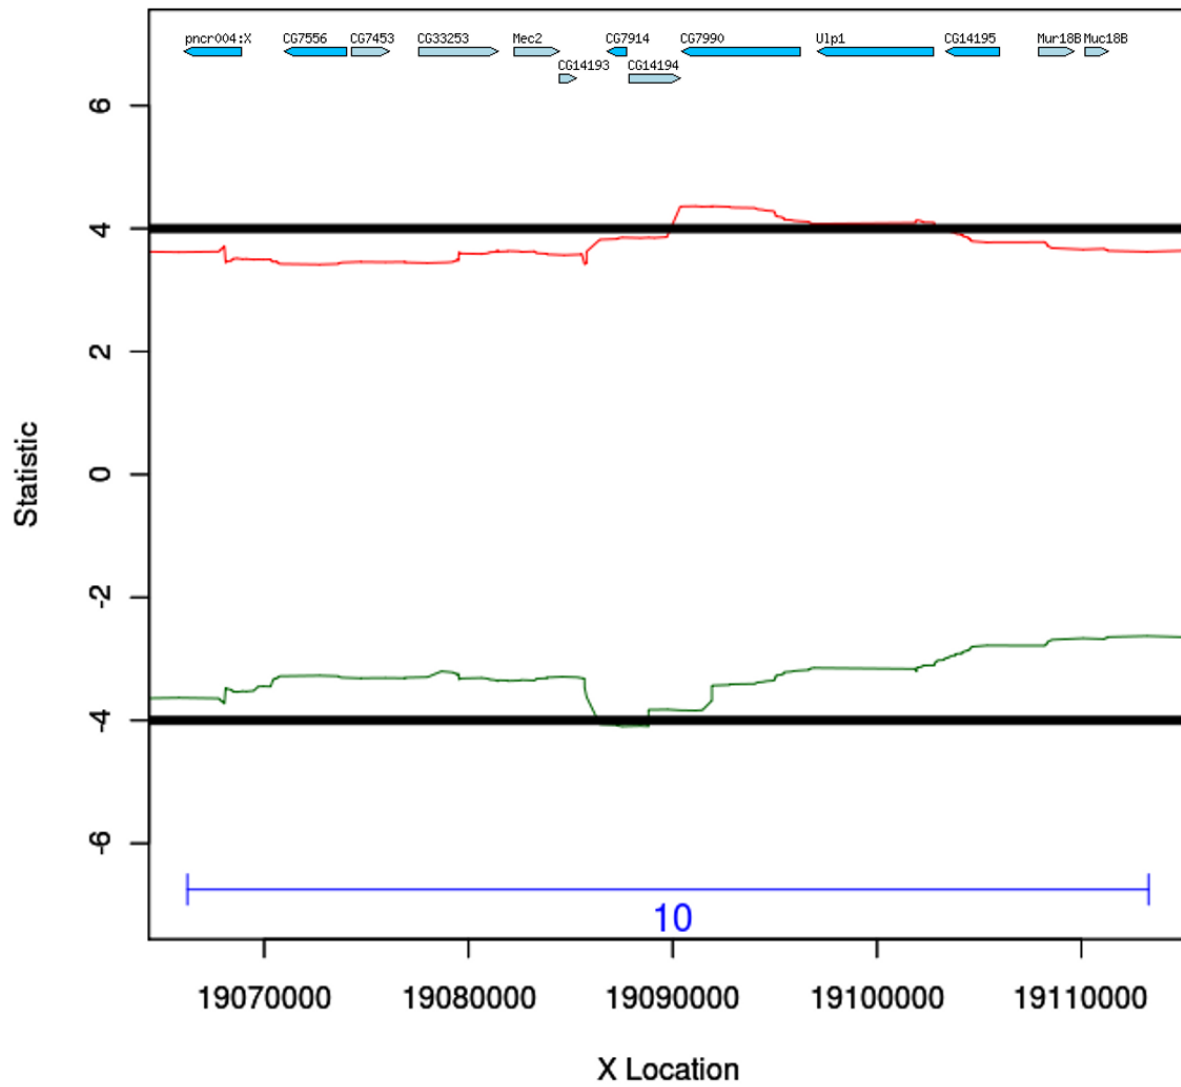

7) Region 11 on X-chromosome:

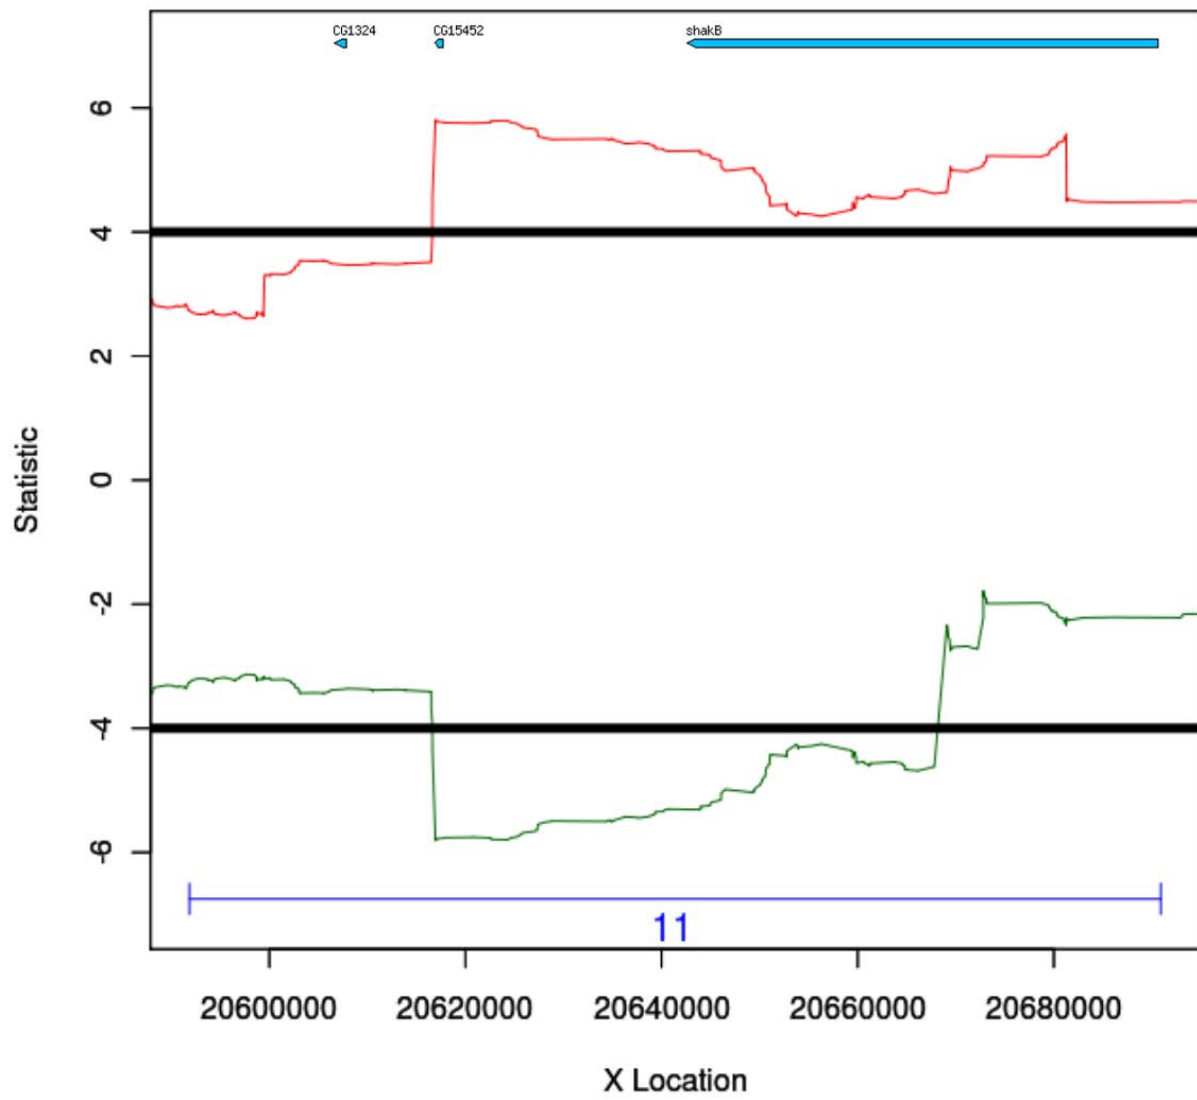

8) Region 12, 13 and 14 on X-chromosome:

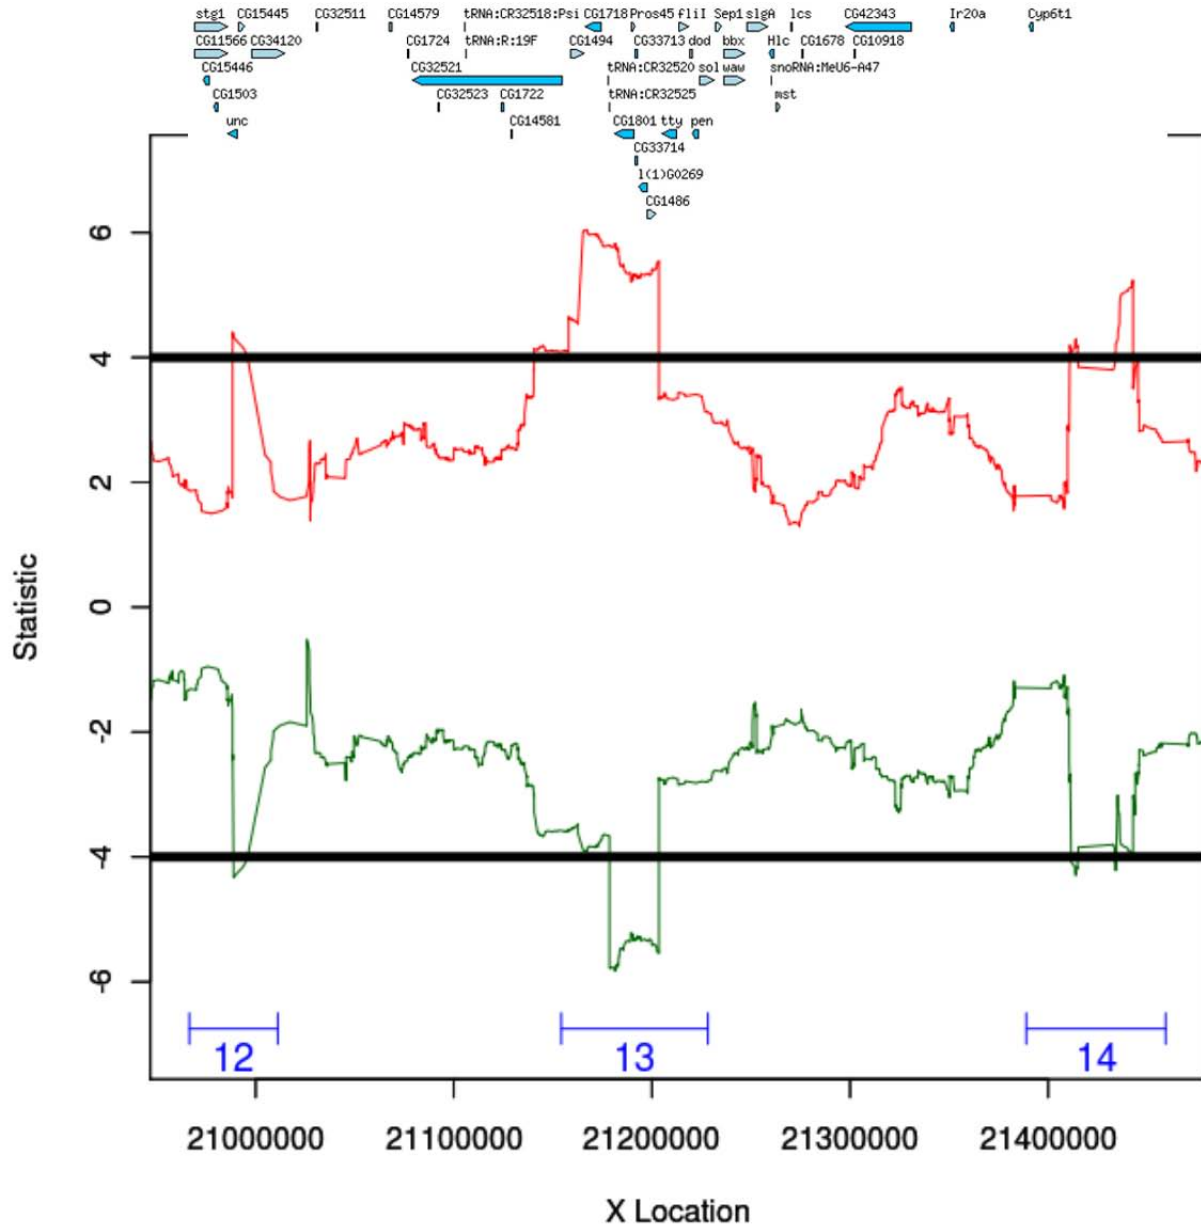



9) Region 15, 16, 17, 18, 19 and 20 on X-chromosome:

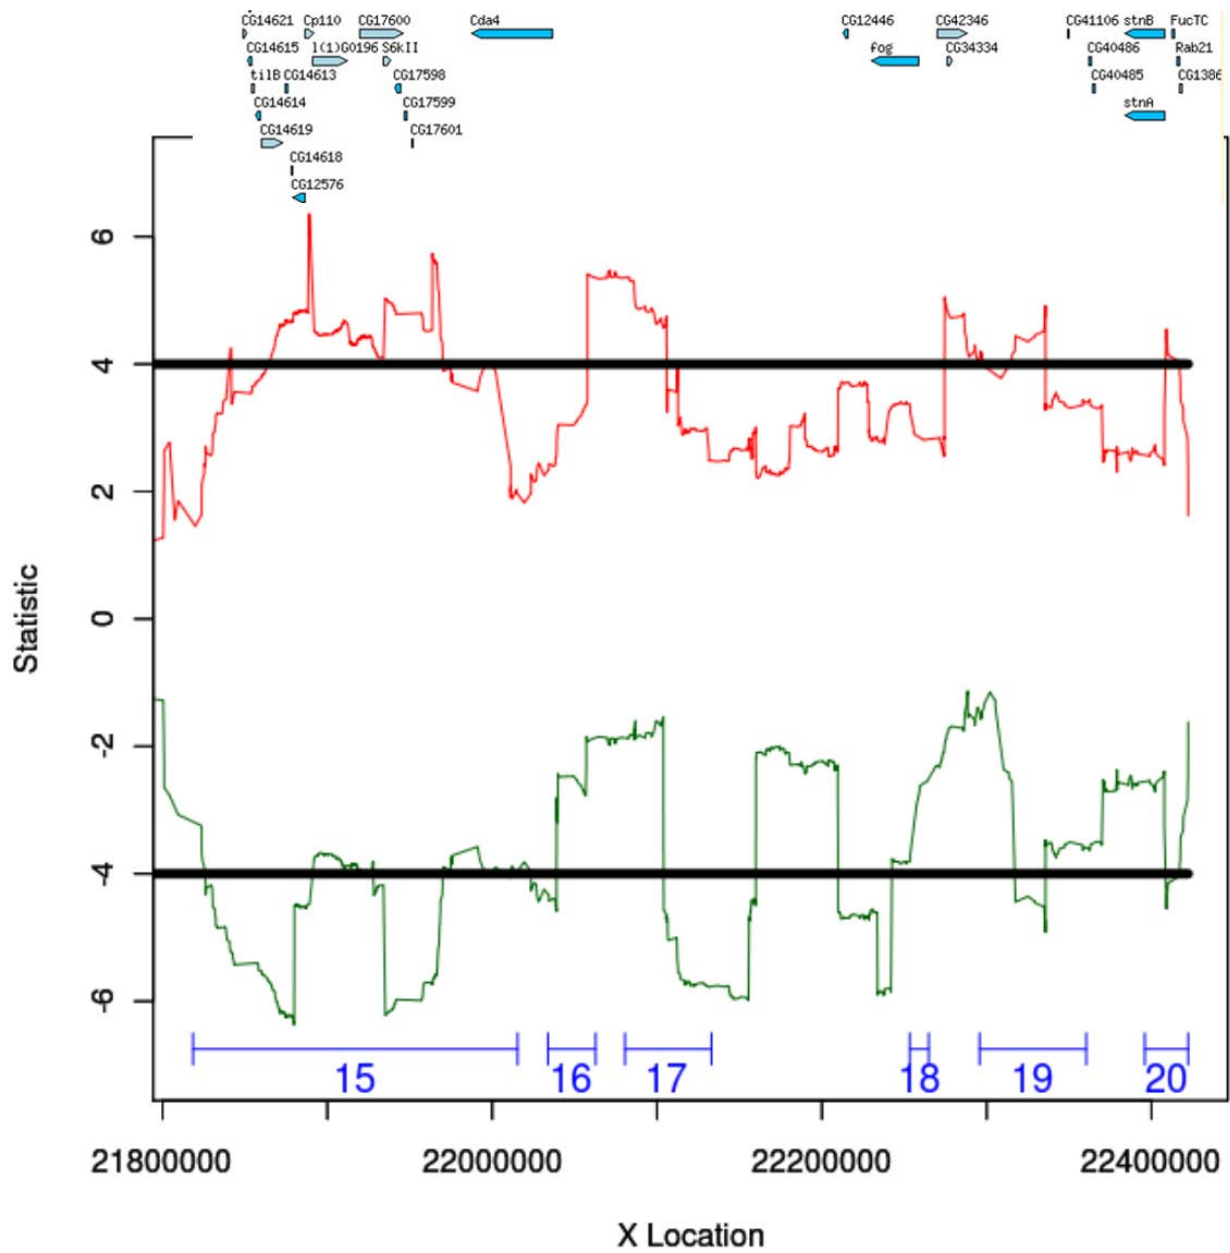

10) Region 21 on Chromosome 3R:

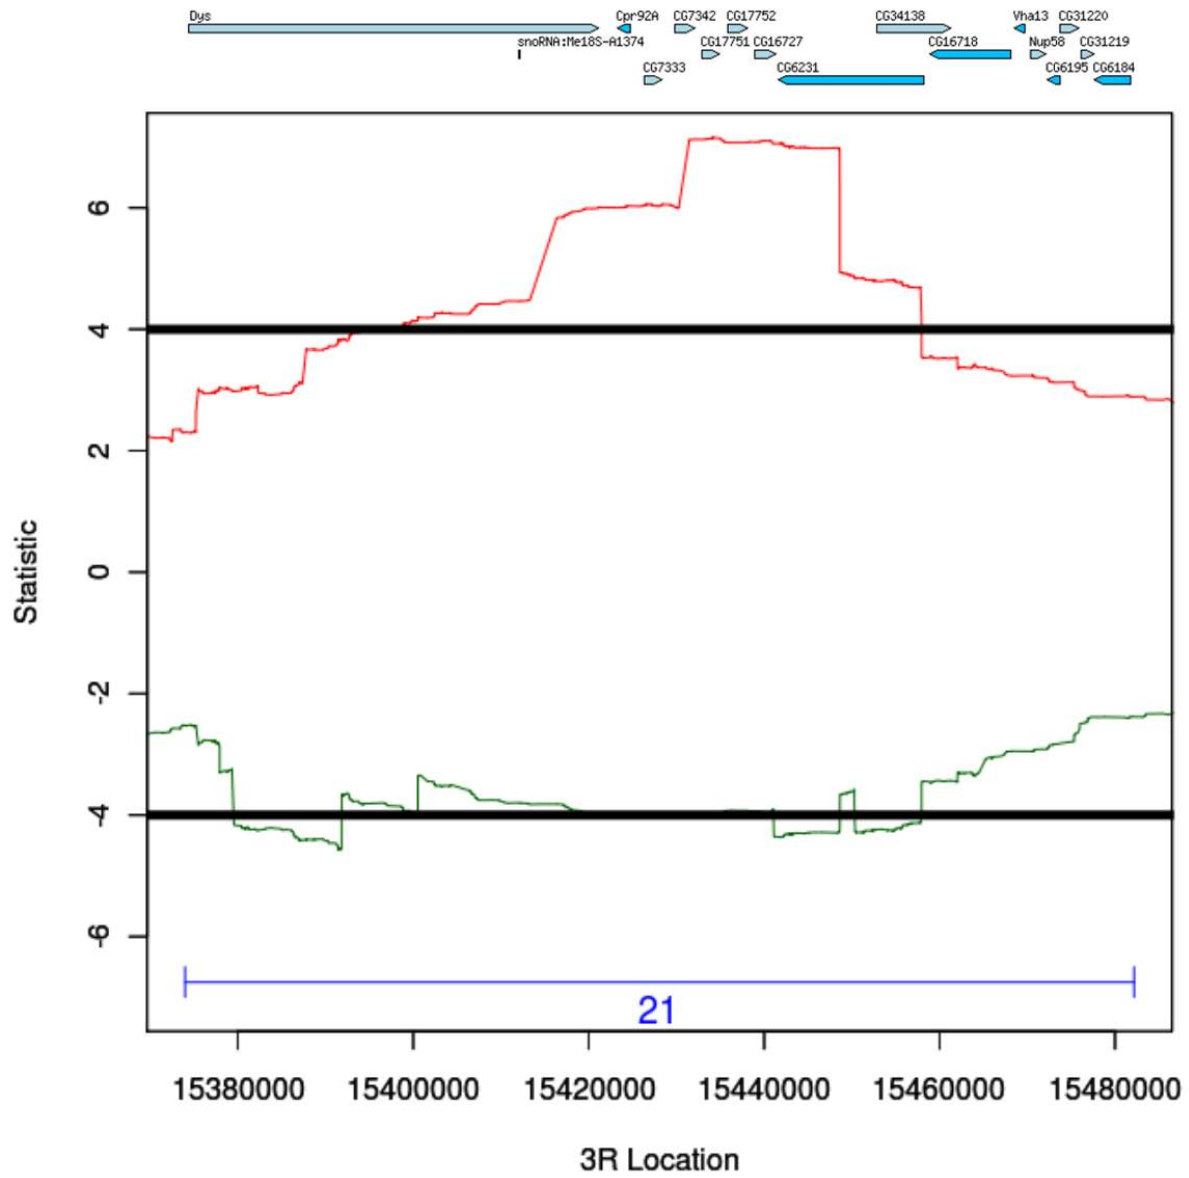

11) Region 22 and 23 on Chromosome 3R:

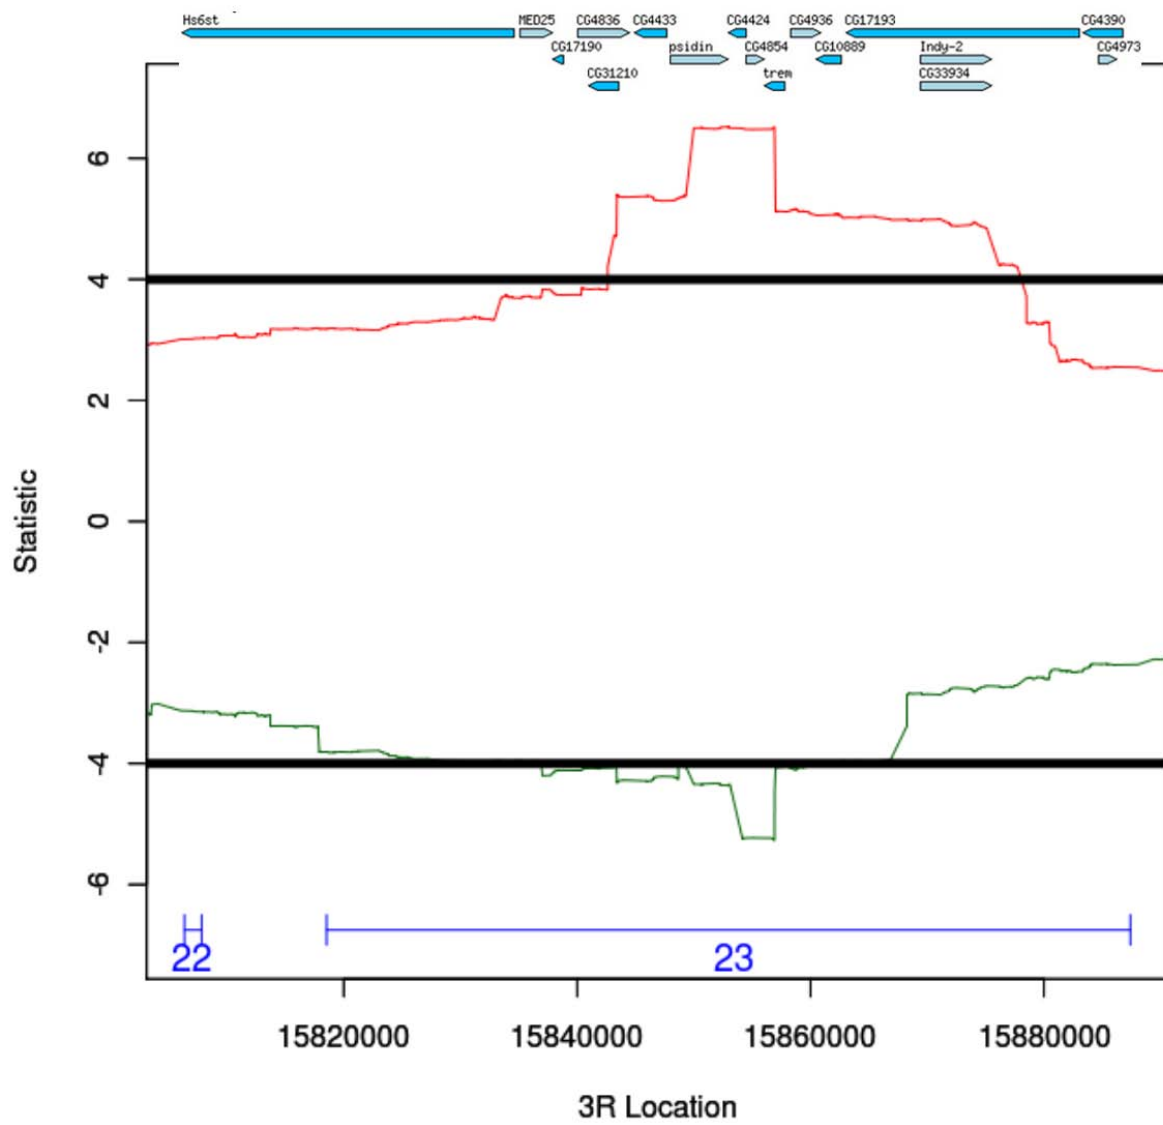

12) Region 24 on Chromosome 3R:

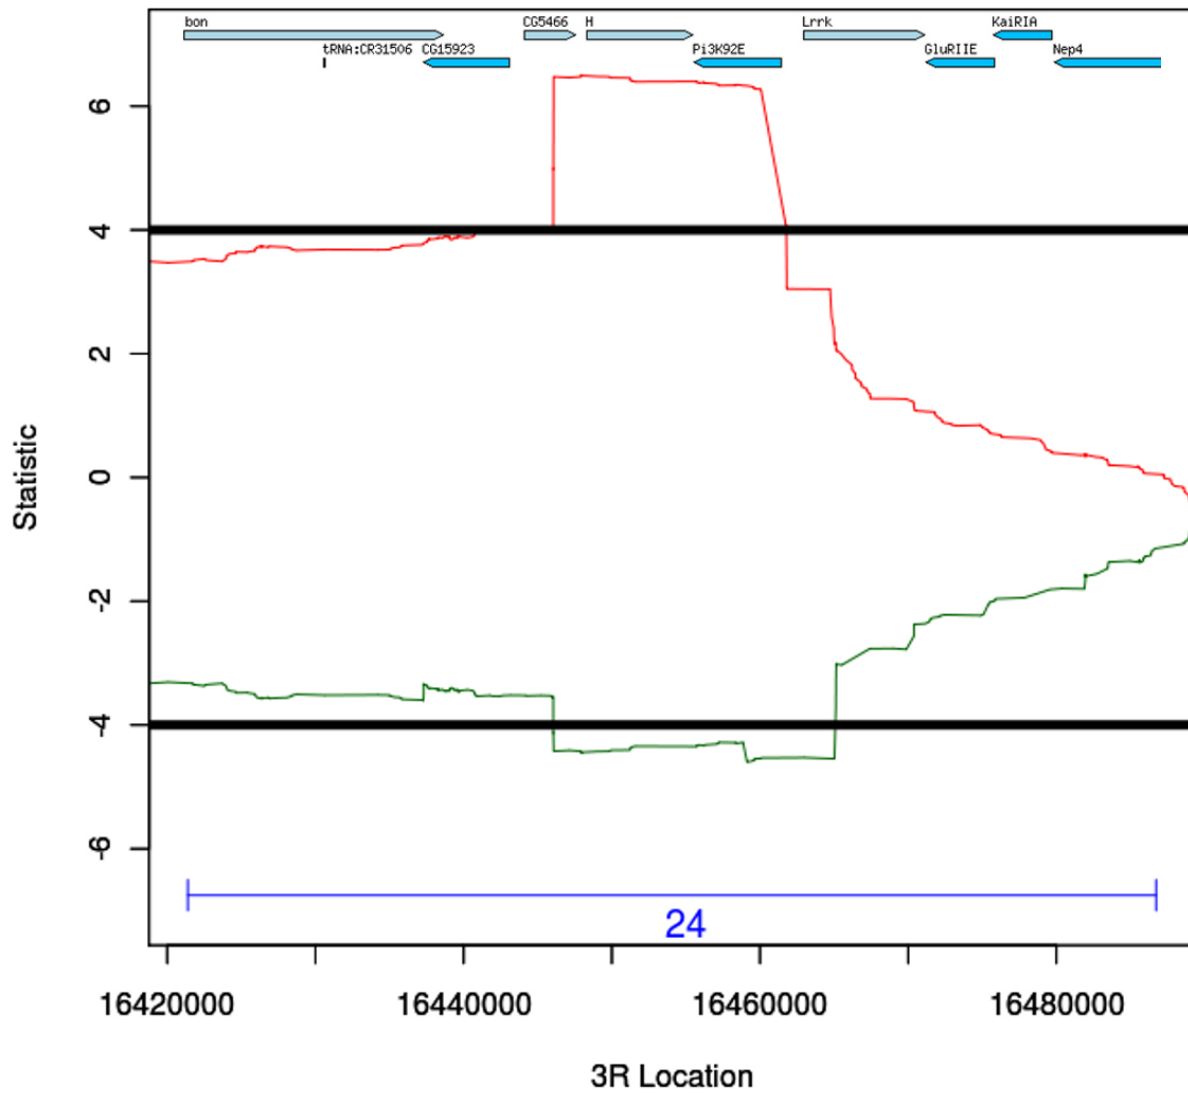

Supplement: 1010643108_sfig01.pdf [file 1010643108_sfig01.pdf]
