# Supplementary material
Source: PubMed Central journal article supplement (PMC3038716)
Supplement: 1010643108_sfig02.pdf [file 1010643108_sfig02.pdf]

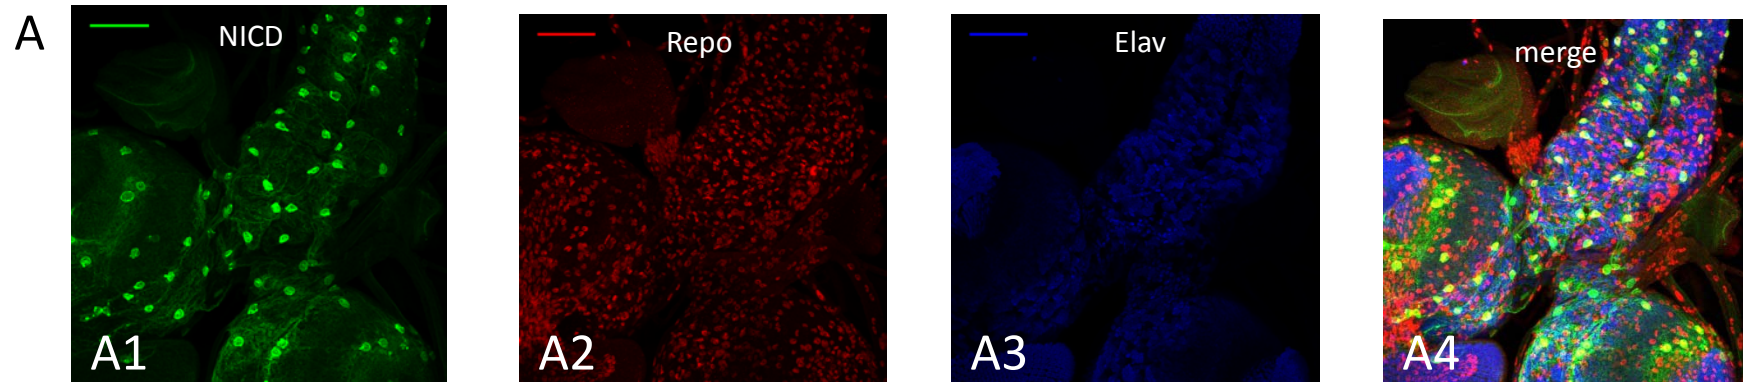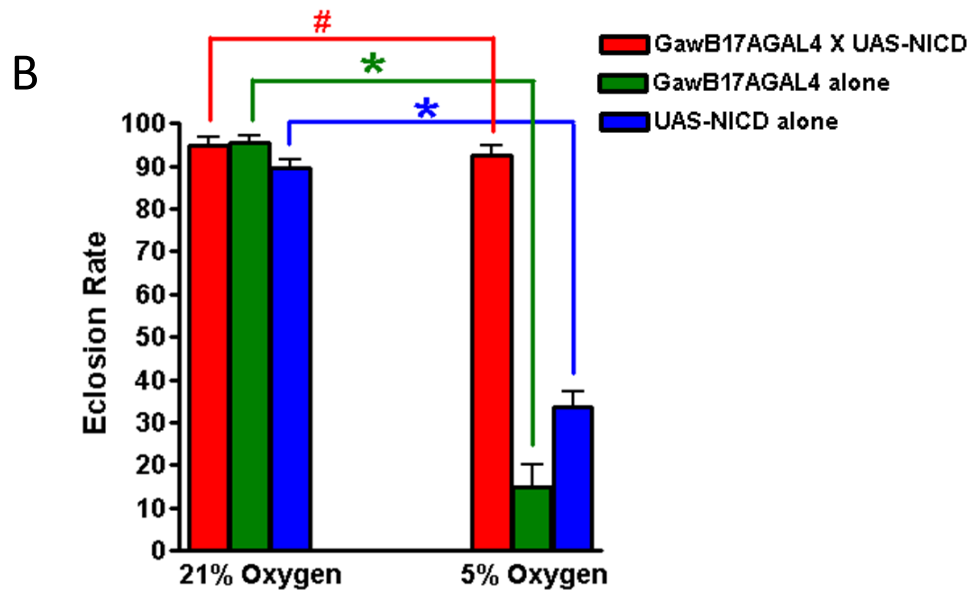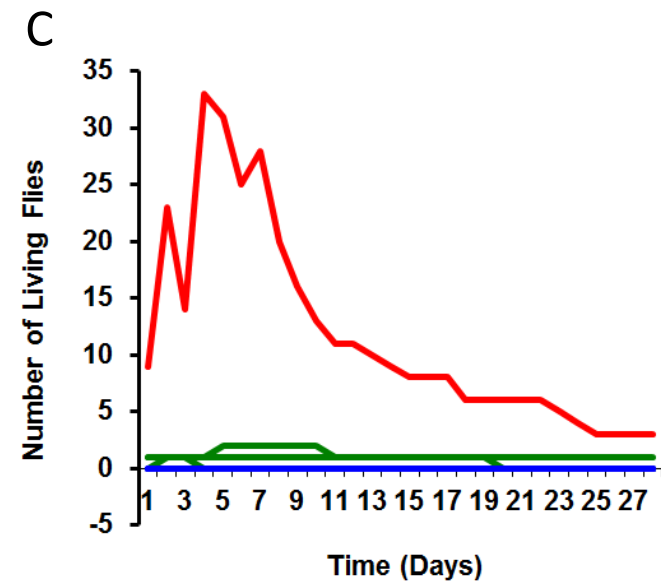

**Fig. S2. Increased hypoxia tolerance in flies with NICD overexpression in specific glial cells.** (A) NICD is over-expressed in the third instar larvae brains (A1). The majority of these NICD over-expressing cells also express Repo (A2), while a few express Elav (A3), and a couple express neither (A4). (B) The eclosion rate of GawB17A>NICD compared to parental lines is significantly higher. (C) An analysis of the adult flies who survive hypoxic eclosure and are maintained in hypoxia clearly displays the advantage of GawB17A>NICD when compared to parental lines. Images taken on Olympus confocal FV1000 at 400X, with Z-projections of planes respectively. Scale bar=50  $\mu$ m. For eclosion rate, means  $\pm$  SEM are displayed; \* $p < 0.0001$ , # $p = 0.456$  as determined by unpaired t-test with 6 vials total, with 3 vials each in two independent experiments.
